# Supplementary material for: Staphylococcal complement evasion by various convertase-blocking molecules
Source: PubMed Central journal article supplement — J Exp Med. 2007 Oct 1;204(10):2461–71. doi: 10.1084/jem.20070818 (PMC2118443; doi:10.1084/jem.20070818), 2007-10-01
Supplement: jexpmed_jem.20070818_2.pdf [file jexpmed_jem.20070818_2.pdf]

**Table S1.** Primers used in this study

| Protein | Primer name | Primer sequence                                      |
|---------|-------------|------------------------------------------------------|
| SCIN-B  | SCIN-B For  | 5'-GAGTAGTCTGGACAAATATTTA-3'                         |
|         | SCIN-B ForI | 5'-CTGGACAAATATTTAACTGAAAGTC-3'                      |
|         | SCIN-B Rev  | 5'-GGAATTCCTTATCTATTTATAA-3'                         |
|         | SCIN-B RevI | 5'-GATACGAAATCATTTT TCTTA-3'                         |
| SCIN-C  | SCIN-C For  | 5'-GAGTAGTAAGAAAGACTATAT-3'                          |
|         | SCIN-C ForI | 5'-AAGAAAGACTATATAATTCAAAGTG-3'                      |
|         | SCIN-C Rev  | 5'-GGAATTCCTTATCTATTTATAATTTCA-3'                    |
|         | SCIN-C RevI | 5'-TTTGCGAAATTATTACTTTTT-3'                          |
| ORF-D   | ORF-D For   | 5'-GAGCAAATCTGAAACTACATCACAT-3'                      |
|         | ORF-D Rev   | 5'-GGAATTCCTTAATTGTTTTGTGAATGC-3'                    |
| Ecb     | EKEcb Rev   | 5'-TAGCAGCTTCAACGTTTTTAGTTTGCAAACATAAAAACGTTGAAGC-3' |
|         | EKEcb For   | 5'-GGATCTGTACGACGATGACGACAAGCAAACATAAAAACGTTGAAGC-3' |
|         | Efblike Rev | 5'-GGAATTCCTTATTTTAAAGTATTAT-3'                      |
| Efb     | EKEfb Rev   | 5'-ACCGTATCCTTCGCTCTTGTCGTCATCGTCGTACAG-3'           |
|         | EKEfb For   | 5'-GACGATGACGACAAGAGCGAAGGATACGGTCCAAGA-3'           |
|         | Efb Rev     | 5'-GGAATTCCTTATCTCACTAATCCTTGTTTTAATAC-3'            |
| Efb-C   | EKEfb-C Rev | 5'-TGCTGGTTTATTAACTTGTCGTCATCGTCGTACAG-3'            |
|         | EKEfb-C For | 5'-GACGATGACGACAAGTTTAAATAAACCAGCAGCGAAA-3'          |
|         | Efb-C Rev   | 5'-GGAATTCCTTATCTCACTAATCCTTGTTTTAATAC-3'            |

The underlined sequences indicate *Eco*R1 restriction sites. For, forward; Rev, reverse.
